# Supplementary material for: Virtual Reality as Tool for Bioprinting Quality Inspection: A Proof of Principle
Source: PubMed Central journal article supplement (PMC9218671; doi:10.3389/fbioe.2022.895842), 2022-06-09
Supplement: DataSheet1.pdf [file DataSheet1.pdf]

**Supplementary Data**
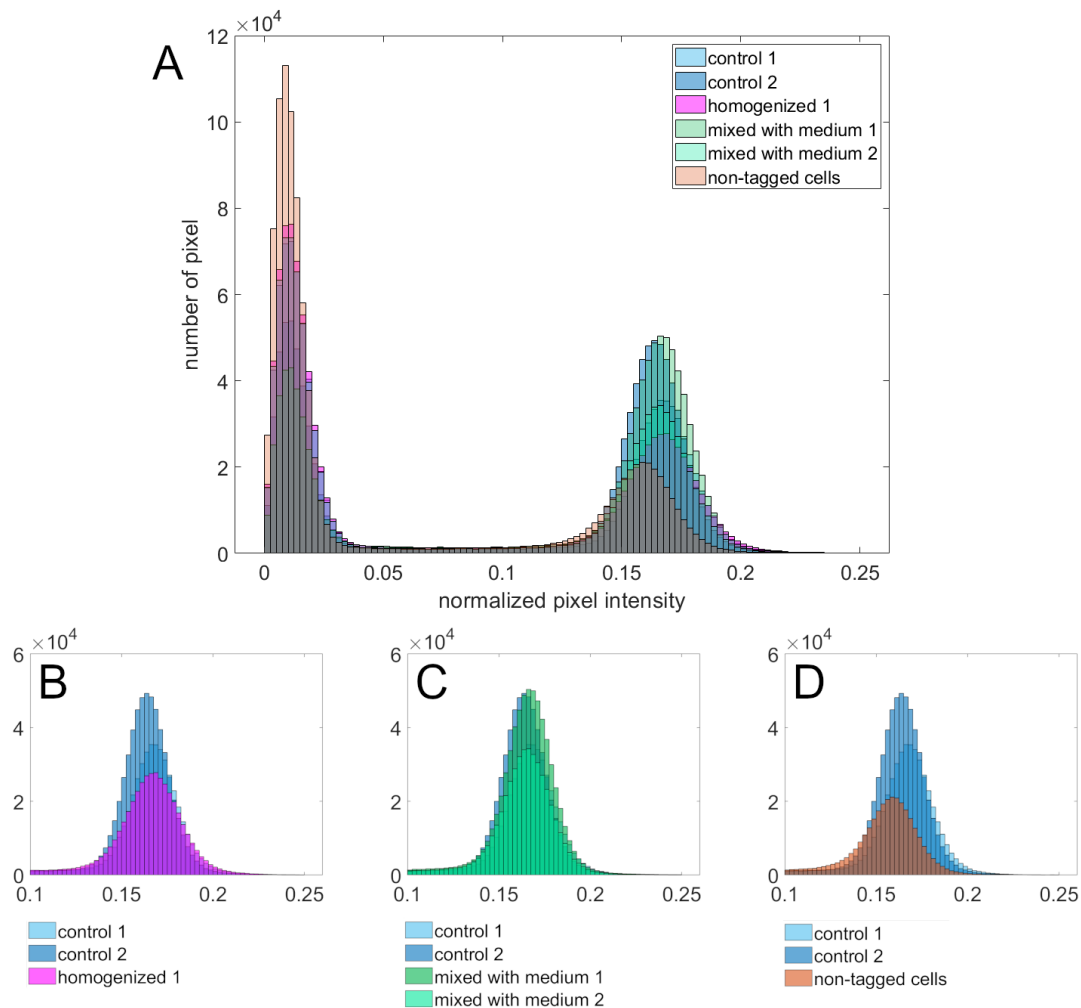

**Supplementary Data 1:** Histogram of reference samples with different material compositions compared to the control samples 'control 1' and 'control 2' that consist of Cellink Bioink used as received. **A)** Overlay of all reference samples. The individual compositions are explained in subfigures B-D. **B)** Cellink Bioink was homogenized in a dual asymmetric centrifuge (Speedmixer®, Hauschild GmbH & Co. KG, Hamm, Germany) for a duration of 5 min at 3500 rpm before 3D printing. **C)** An amount of 6 ml of Cellink Bioink was mixed with 600  $\mu$ l of cell culture medium (Speedmixer®; 5 min; 3500 rpm) before printing with a 3 ml cartridge. MRI measurement was conducted for 2 samples printed with one cartridge of 3 ml. **D)** Bioink consisting of 3 ml of Cellink Bioink and 0.3 ml of cell suspension was prepared as described in section 2.2 of the manuscript with the exception that the NIH-3T3 fibroblasts were not tagged with NanoShuttle-PL contrast agent.

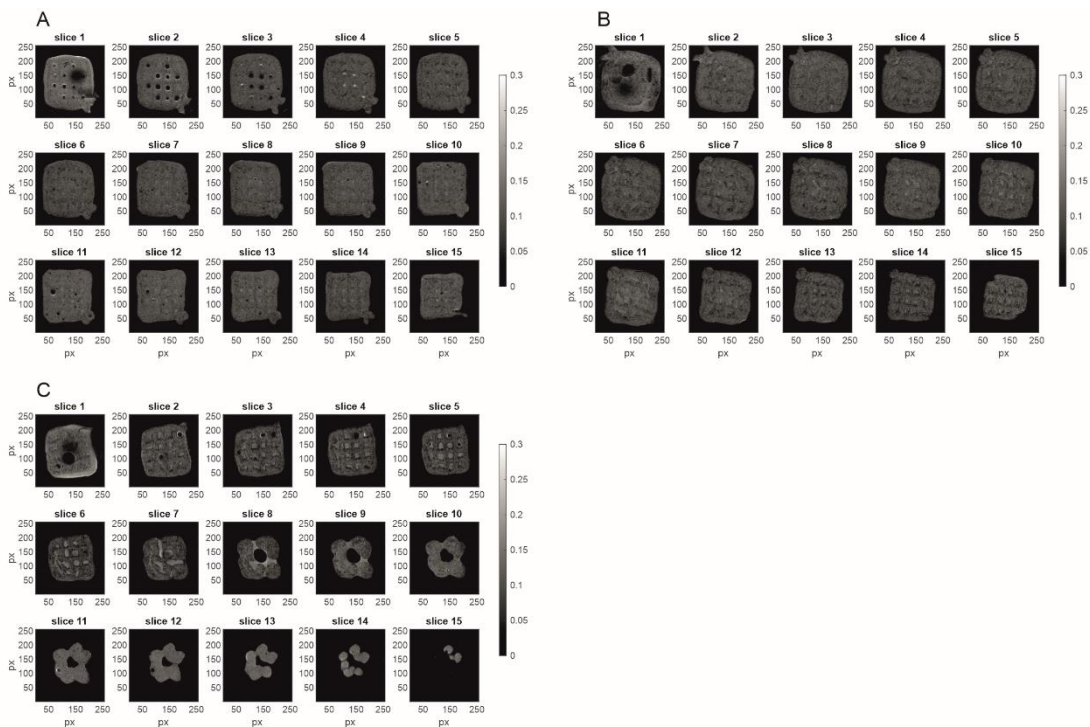

**Supplementary Data 2:** MRI data of the process samples run 2. Shown are the grey scale images of the 15 axial slices (z-stack) with slice 1 as bottom and slice 15 as top slice (slice thickness 0.4 mm, in plane matrix 256 x 256 px). **A)** sample 1, field of view 16 x 16 mm<sup>2</sup> **B)** sample 2, field of view 14 x 14 mm<sup>2</sup> **C)** sample 3, field of view 14 x 14 mm<sup>2</sup>. The corresponding histograms of the normalized pixel intensity are shown in Figure 3 B).

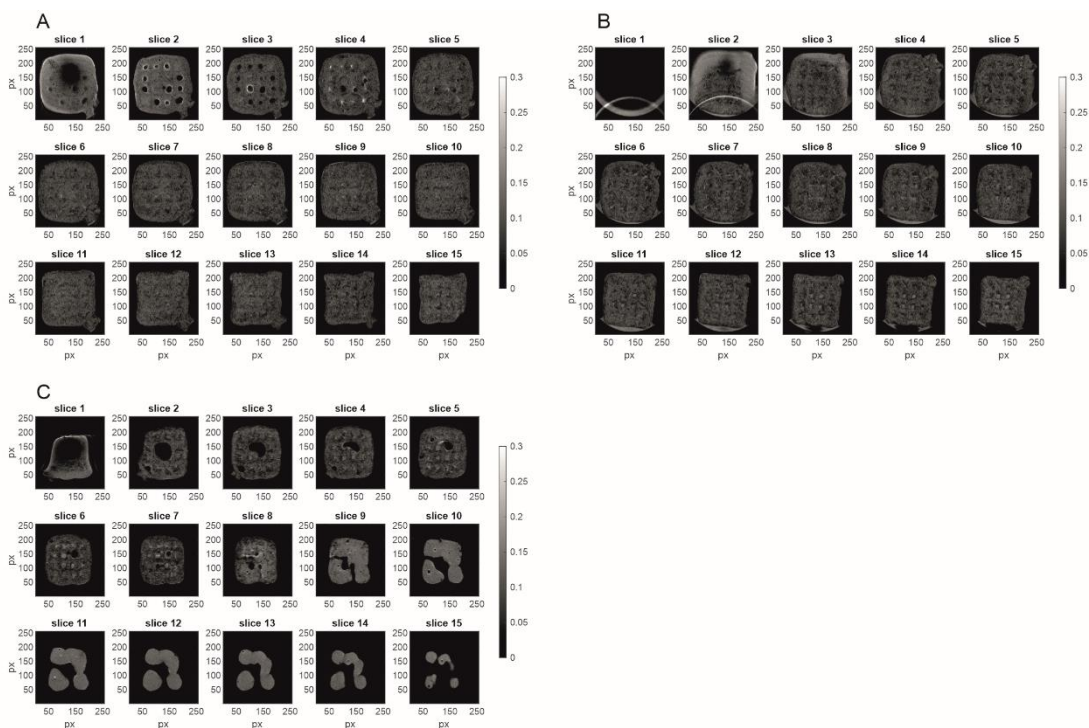

**Supplementary Data 3:** MRI data of the process samples run 3. Shown are the grey scale images of the 15 axial slices (z-stack) with slice 1 as bottom and slice 15 as top slice (slice thickness 0.4 mm, in plane matrix 256 x 256 px, field of view: 14 x 14 mm<sup>2</sup>). **A)** sample 1 **B)** sample 2 **C)** sample 3. The histogram of the normalized pixel intensity of samples 1 – 3 is shown in Figure 3 C).

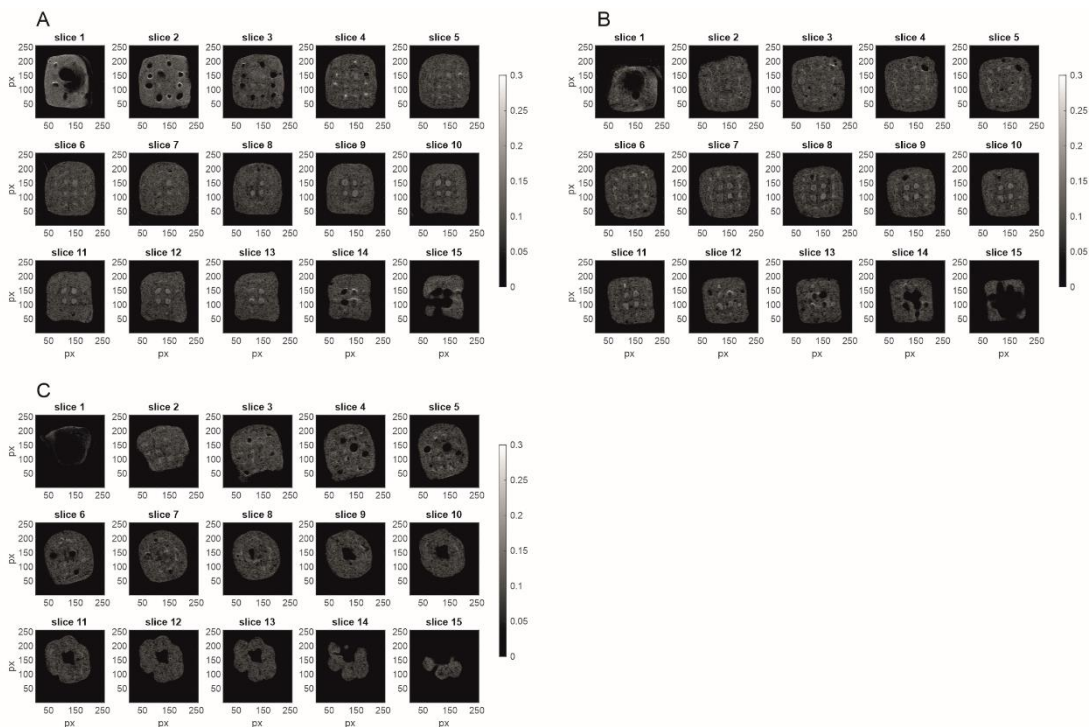

**Supplementary Data 4:** MRI data of the process samples run 4. Shown are the grey scale images of the 15 axial slices (z-stack) with slice 1 as bottom and slice 15 as top slice (slice thickness 0.4 mm, in plane matrix 256 x 256 px, field of view: 14 x 14 mm<sup>2</sup>). **A)** sample 1 **B)** sample 2 **C)** sample 3. The histogram of the normalized pixel intensity is shown in Figure 3 D).

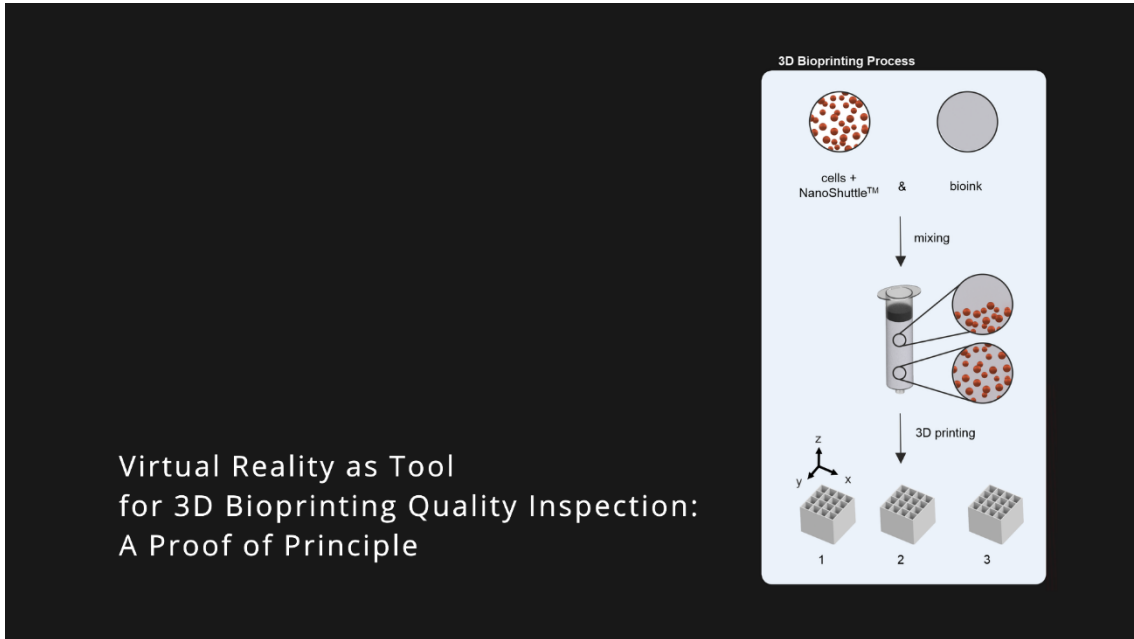

**Supplementary Data 5:** Video of a recorded VR session. Shown is the 3D data from control 1 and the process samples 1 – 3 (run 1). The video is edited for storytelling purpose: indication of sample and channel in the bottom left corner; indication of the cQA cell distribution in the top right corner. Each sample is visualized separately in rotation. Channels (RGB) are shown overlaid and subsequently switched off (RGB = red, green, blue; RG = red, green; R = red).

**Supplementary Table 1:** Example allocating the used commands for the 2D Image Analysis (section 2.4) in a sequential way. The individual form of the code options is depending on the MATLAB version and installed toolboxes.

| No. | Step                                                   | Software                                            | Comment                                                                                                                                                        |
|-----|--------------------------------------------------------|-----------------------------------------------------|----------------------------------------------------------------------------------------------------------------------------------------------------------------|
| 1)  | load MRI data (.mat) into MATLAB                       | MATLAB 2020a (The MathWorks, Inc., Natick, 196 USA) | open the sample(s) raw data matrix of grayscale values using 'load'                                                                                            |
| 2)  | metadata                                               | MATLAB 2020a (The MathWorks, Inc., Natick, 196 USA) | define the experimental dimension of field of view as matrix, for example 'field_of_view = [12];', where the value 12 represents a field of view of 12 x 12 mm |
| 3)  | preview MRI slices                                     | MATLAB 2020a (The MathWorks, Inc., Natick, 196 USA) | use the commands 'figure' and 'subplot' with the colormap 'gray'                                                                                               |
| 4)  | normalize pixel intensity with regard to field of view | MATLAB 2020a (The MathWorks, Inc., Natick, 196 USA) | scale individual sample matrix with arithmetic operator, for example 'data_scaled(:,:,j) = data(:,:,j)/(field_of_view(j))^2;'                                  |
| 5)  | histogram                                              | MATLAB 2020a (The MathWorks, Inc., Natick, 196 USA) | create a histogram using 'histogram' and adapt the depicted graph with 'BinLimits', and 'BinWidth'                                                             |

**Supplementary Table 2:** Example allocating the used commands for the 3D Image Analysis (section 2.5) and used software in a sequential way. The individual form of the code options is depending on the MATLAB version and installed toolboxes. A detailed explanation of the transfer from RGB z-stack to NIfTI for compatibility with ConfocalVR can be found in Stefani et al., 2018.

| No. | Step                                               | Software                                                                                                                                         | Comment                                                                                                                                                                                                                                                                        |
|-----|----------------------------------------------------|--------------------------------------------------------------------------------------------------------------------------------------------------|--------------------------------------------------------------------------------------------------------------------------------------------------------------------------------------------------------------------------------------------------------------------------------|
| 1)  | data normalization (analogue to 2D Image analysis) | MATLAB 2020a (The MathWorks, Inc., Natick, 196 USA)                                                                                              | scale individual sample matrix with arithmetic operator, for example<br>'data_scaled(:,:,:) = data(:,:,:)/(field_of_view(j))^2;'                                                                                                                                               |
| 2)  | generate pseudo color images (RGB)                 | MATLAB 2020a (The MathWorks, Inc., Natick, 196 USA)                                                                                              | using the command 'imagesc' and save each image of the stack as tif image<br><br>use the same 'caxis' and RGB colormap for each image, check that the image is not rotated, resized or otherwise compromised, no ticks or labels should be present                             |
| 3)  | re-stack RGB images                                | MATLAB 2020a (The MathWorks, Inc., Natick, 196 USA)                                                                                              | re-stack the pseudo color tif images into a new matrix using the command 'imwrite'                                                                                                                                                                                             |
| 4)  | convert RGB z-stack to NIfTI                       | ImageJ (National Institutes of Health [NIH], Bethesda, MD; available on ( <a href="https://imagej.nih.gov/ij/">https://imagej.nih.gov/ij/</a> )) | as described in Stefani et al., 2018 (fig. 1):<br><br>load image stack with Bio-format plugin<br><br>choose visual representation (color channel 'red, green, blue')<br><br>'convert to' RGB color image stack<br><br>Save as NIfTI data transfer format to open in ConfocalVR |
| 5)  | ConfocalVR                                         | ConfocalVR 3.2 218 (Immersive Science LLC, Newcastle, WA USA)                                                                                    | As described in Stefani et al., 2018:<br><br>rotation of virtual sample and RGB channel (de)activation in virtual control panel                                                                                                                                                |
